# Supplementary material for: Lipidomic and in-gel analysis of maleic acid co-polymer nanodiscs reveals differences in composition of solubilized membranes
Source: PubMed Central journal article supplement (PMC7886889; doi:10.1038/s42003-021-01711-3), 2021-02-16
Supplement: 42003_2021_1711_MOESM1_ESM.pdf [file 42003_2021_1711_MOESM1_ESM.pdf]

**Lipidomic and in-gel analysis of maleic acid co-polymer nanodiscs reveals differences in composition of solubilized membranes**

Marta Barniol-Xicot<sup>a</sup> and Steven H. L. Verhelst \*<sup>a,b</sup>

<sup>a</sup> KU Leuven – University of Leuven, Laboratory of Chemical Biology, Department of Cellular and Molecular Medicine, Herestraat 49 box 802, 3000 Leuven, Belgium

<sup>b</sup> Leibniz Institute for Analytical Sciences ISAS, AG Chemical Proteomics, Otto-Hahn-Str. 6b, 44227 Dortmund, Germany

**Index**

|                         |     |
|-------------------------|-----|
| Supplementary Method    | S1  |
| Supplementary Figure S1 | S4  |
| Supplementary Figure S2 | S5  |
| Supplementary Figure S3 | S6  |
| Supplementary Figure S4 | S6  |
| Supplementary Figure S5 | S7  |
| Supplementary Figure S6 | S8  |
| Supplementary Figure S7 | S9  |
| Supplementary Figure S8 | S10 |
| Supplementary Figure S9 | S11 |
| Supplementary note      | S12 |

## Supplementary Method

IR-spectra of the xMA polymers

### Styrene maleic acid (2.3:1)

IR (ATR)  $\nu$ : 2927, 1566, 1492, 1411, 759, 698  $\text{cm}^{-1}$ .

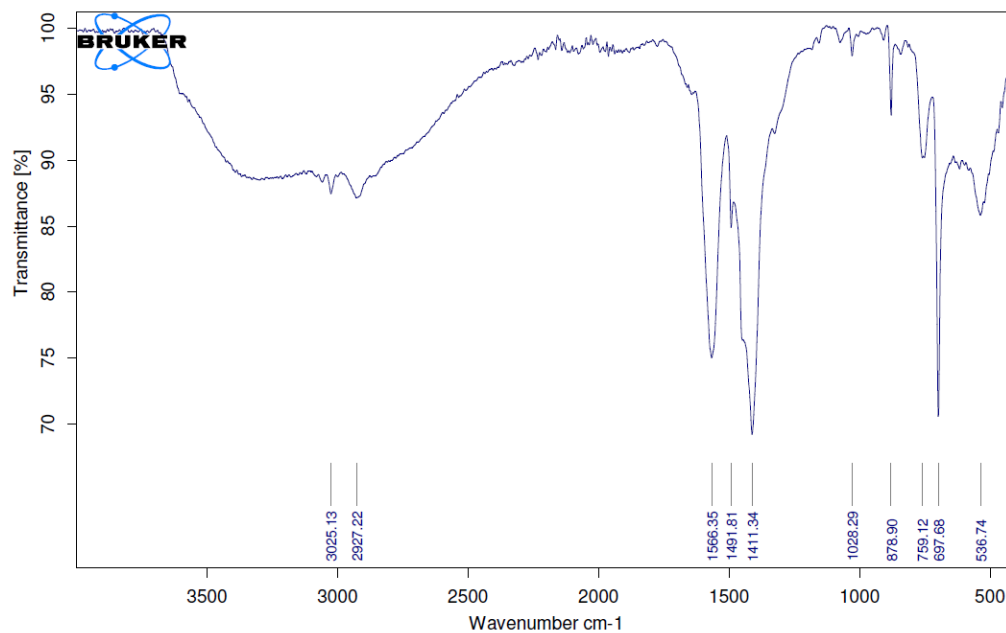

### Diisobutylene maleic acid (1:1)

IR (ATR)  $\nu$ : 2947, 1709, 1366, 1186, 921  $\text{cm}^{-1}$ .

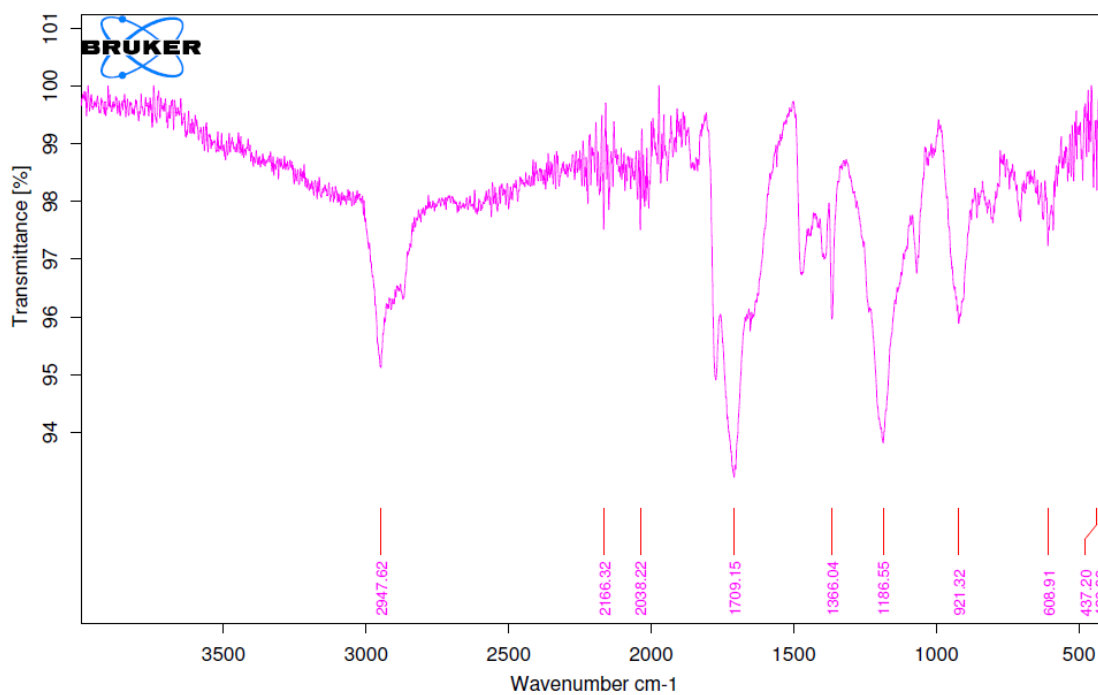

### Styrene maleic anhydride (2.3:1)

IR (ATR) v: 2923, 1855, 1774, 1493, 1453, 914, 698  $\text{cm}^{-1}$ .

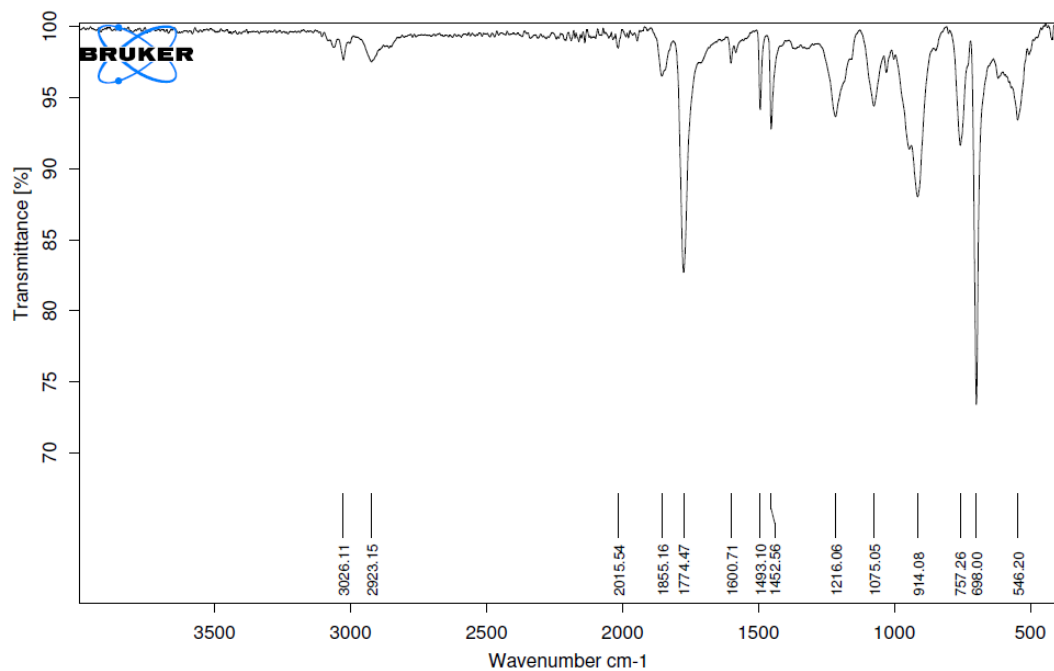

### Styrene trimethyl-ethylamine maleimide (SMA-QA)

IR (ATR) v: 3014, 1695, 1486-1146, 701  $\text{cm}^{-1}$ .

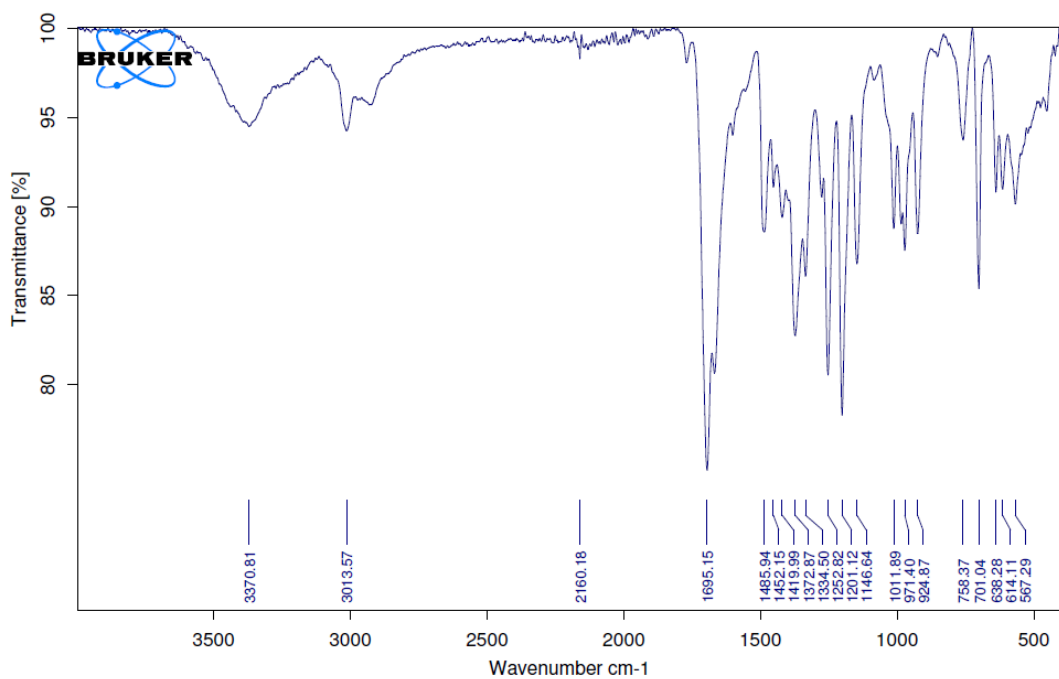

## SMA QA vs SMAnh

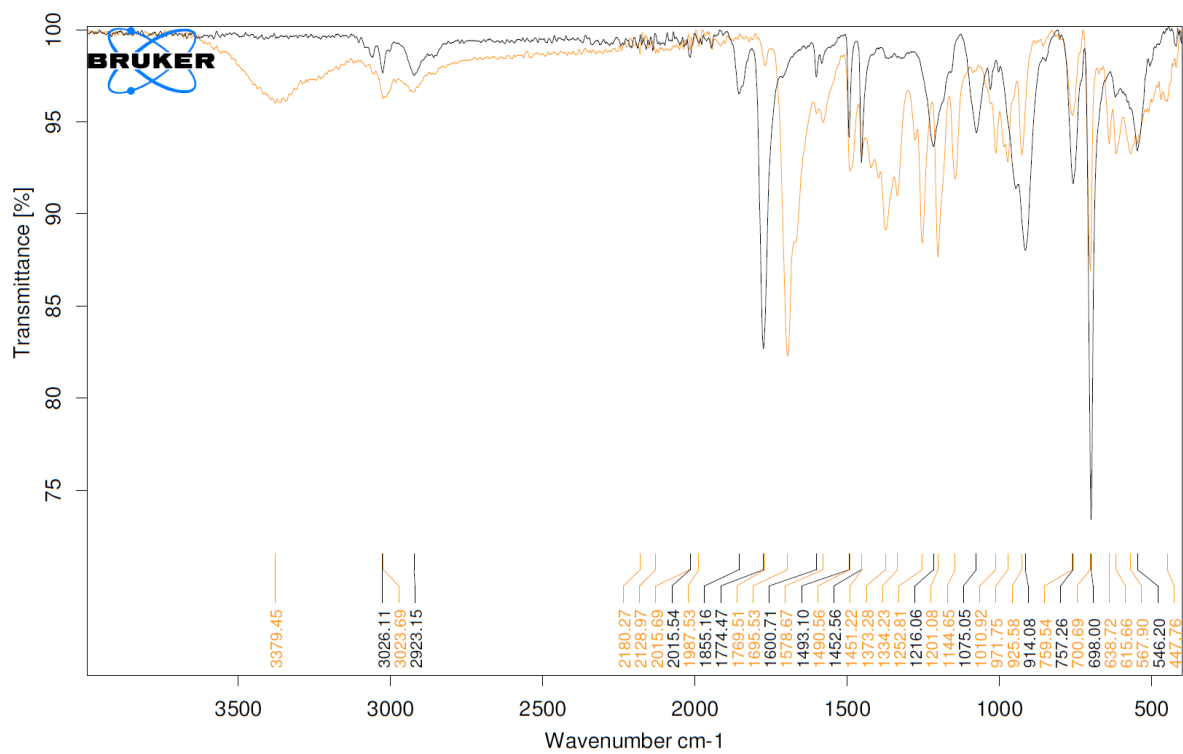

Superimposition of SMA-QA (in orange) and SMAnh IR (in grey) spectra.

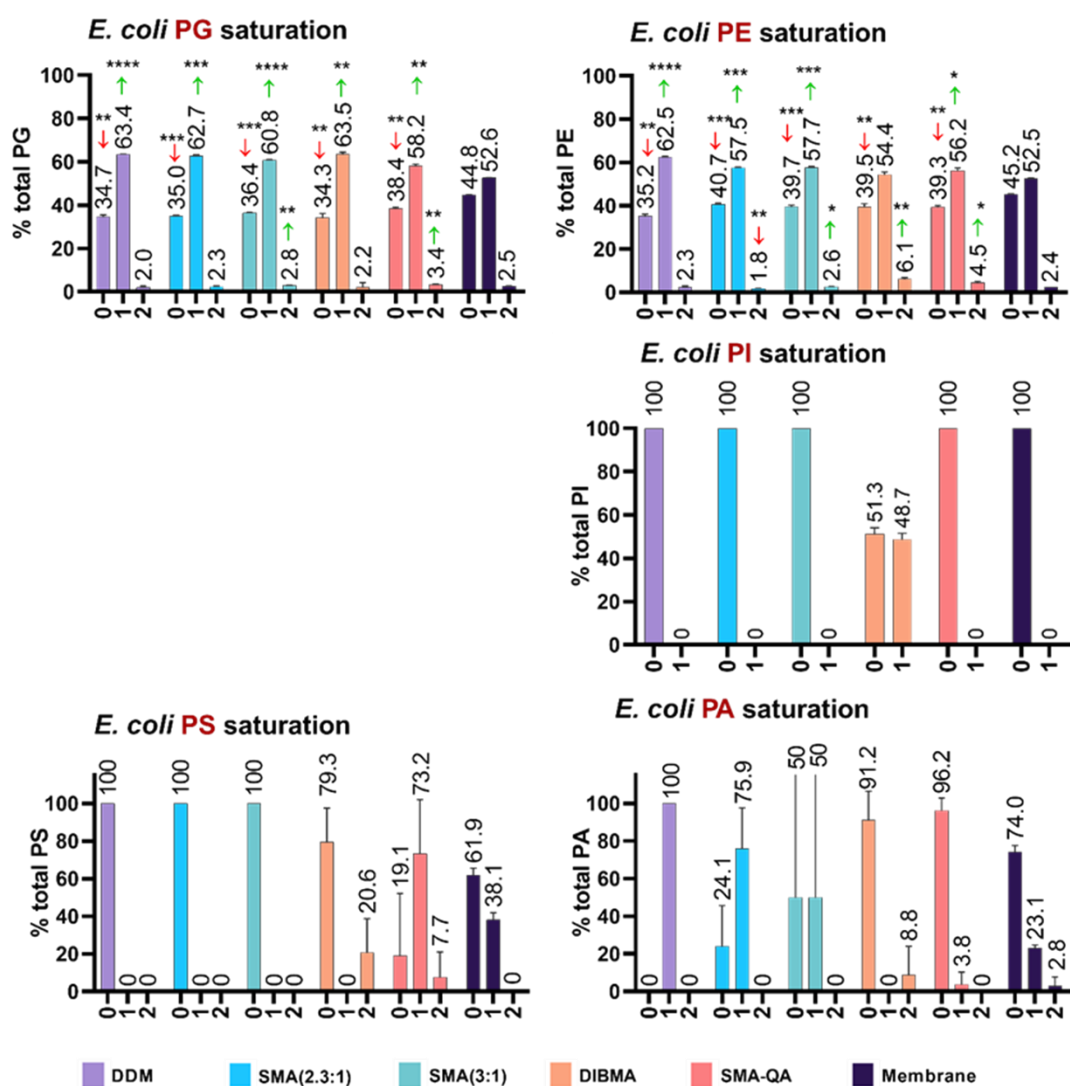

**Figure S1.** Saturation of PL species present in *E. coli* classified depending on their headgroup, being: PG, PE, PI, PS or PA. The number of double bonds indicated are those found in the total fatty acid chains of a single PL species<sup>†</sup>.

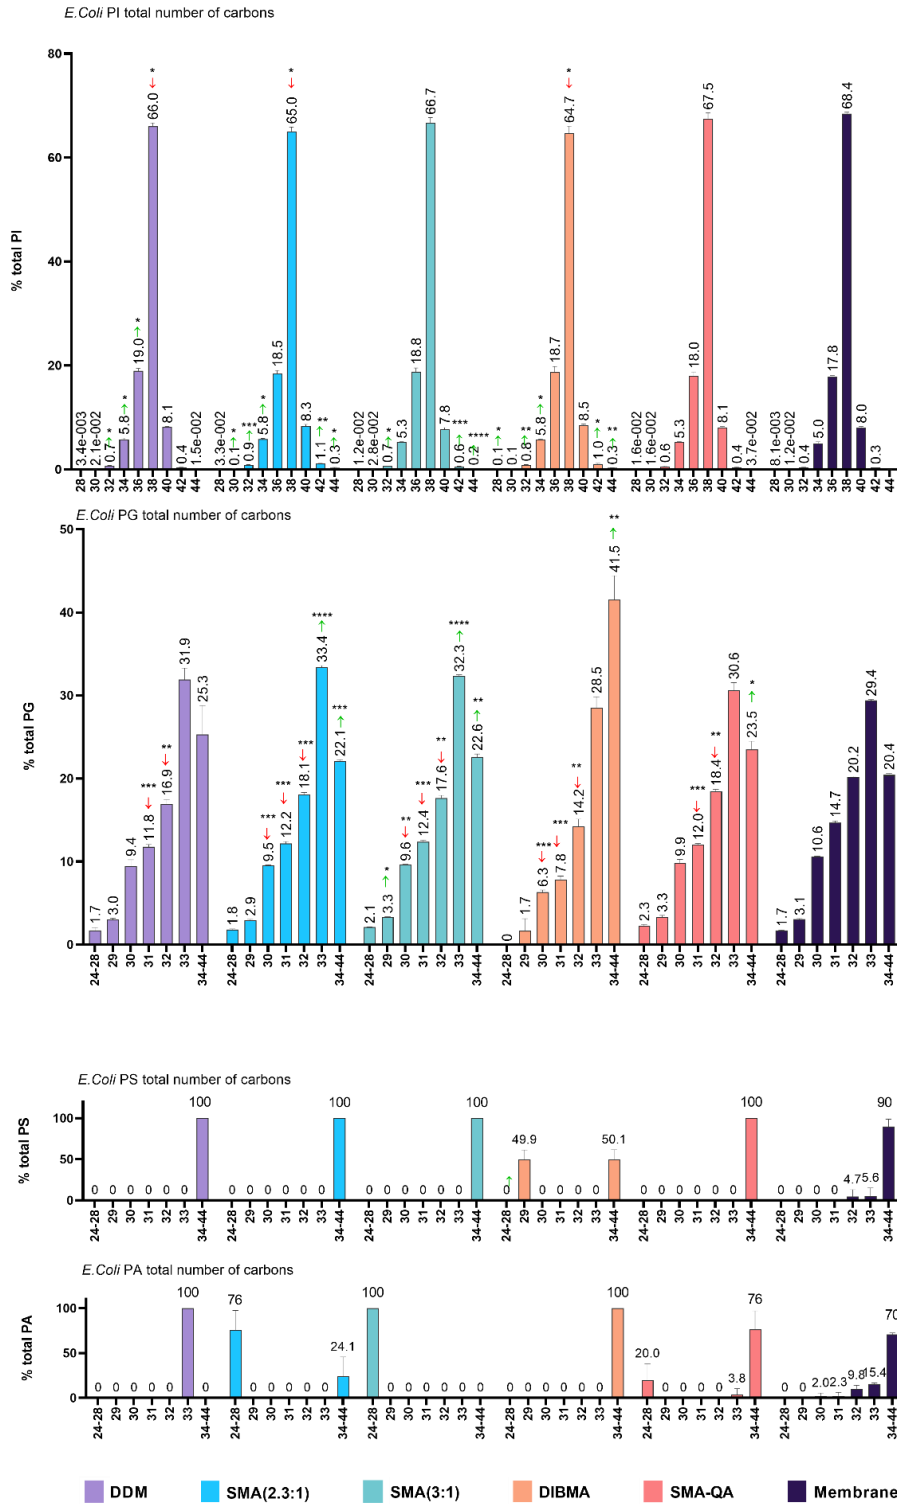

**Figure S2.** Fatty acid chain length distribution in *E. coli* samples represented by the number of carbons present in the fatty acid chains of the total PI, PG, PS or PA species<sup>‡</sup>.

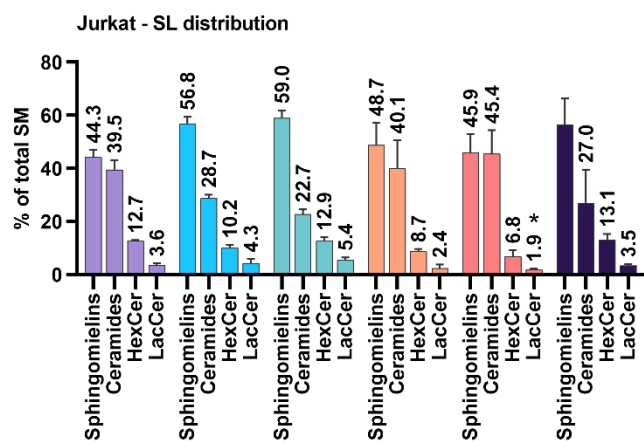

**Figure S3.** Distribution of species present in the SL fraction of solubilized Jurkat membranes<sup>‡</sup>.

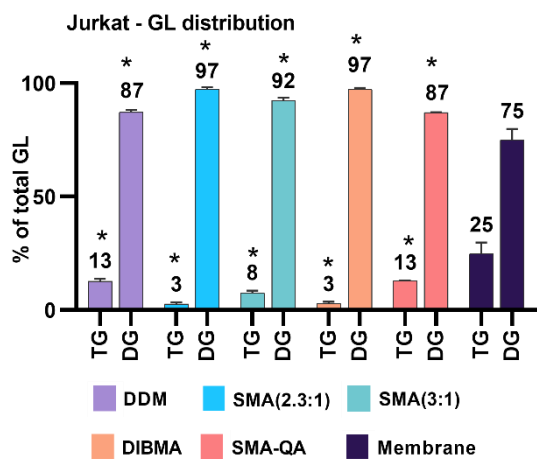

**Figure S4.** Distribution of species present in the GL fraction of solubilized Jurkat membranes<sup>‡</sup>. DG stands for diacylglycerol and TG for triacylglycerol<sup>‡</sup>.

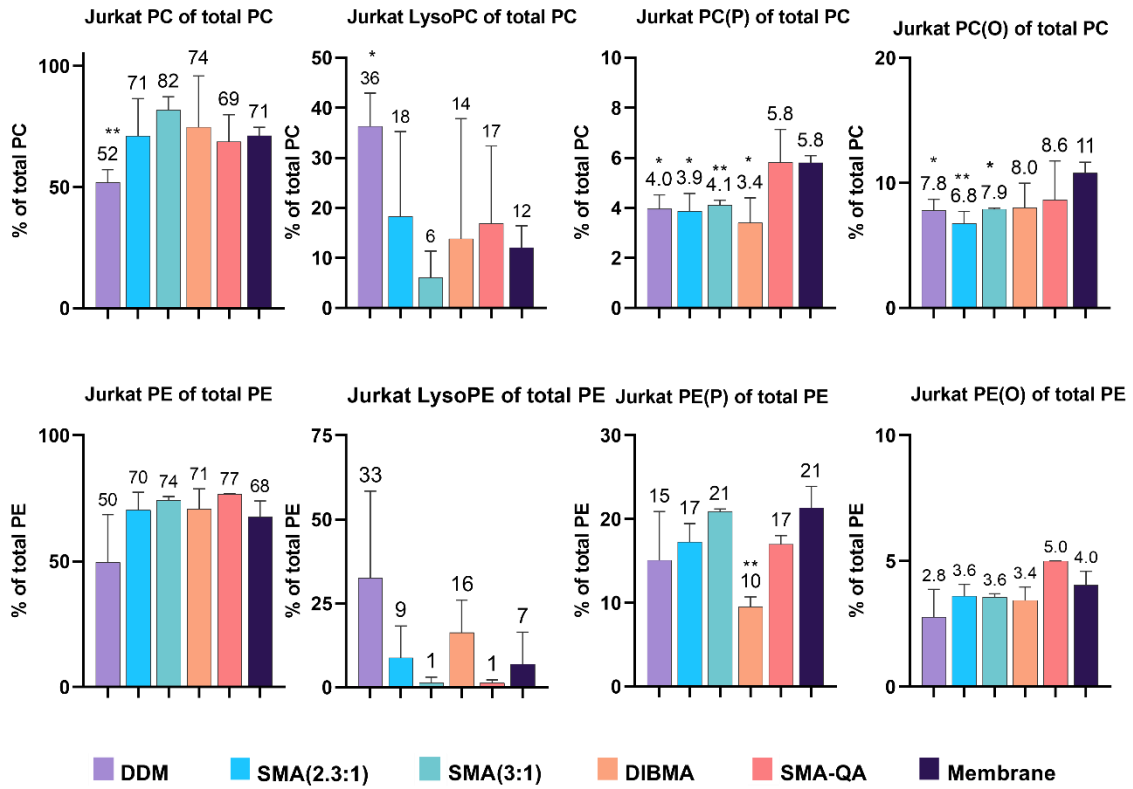

**Figure S5.** Analysis of the PC and PE fractions of Jurkat membranes. The found different species are: intact PE or PC, being PE or PC with two acyl chains; lysoPE or lysoPC if one of the acyl chain is lost; PE(P) or PC(P) if one of the ester bonds is replaced by an alkenyl ether linkage and PE(O) or PC(O) when the ester linkage is replaced by an alkyl ether bond ‡.



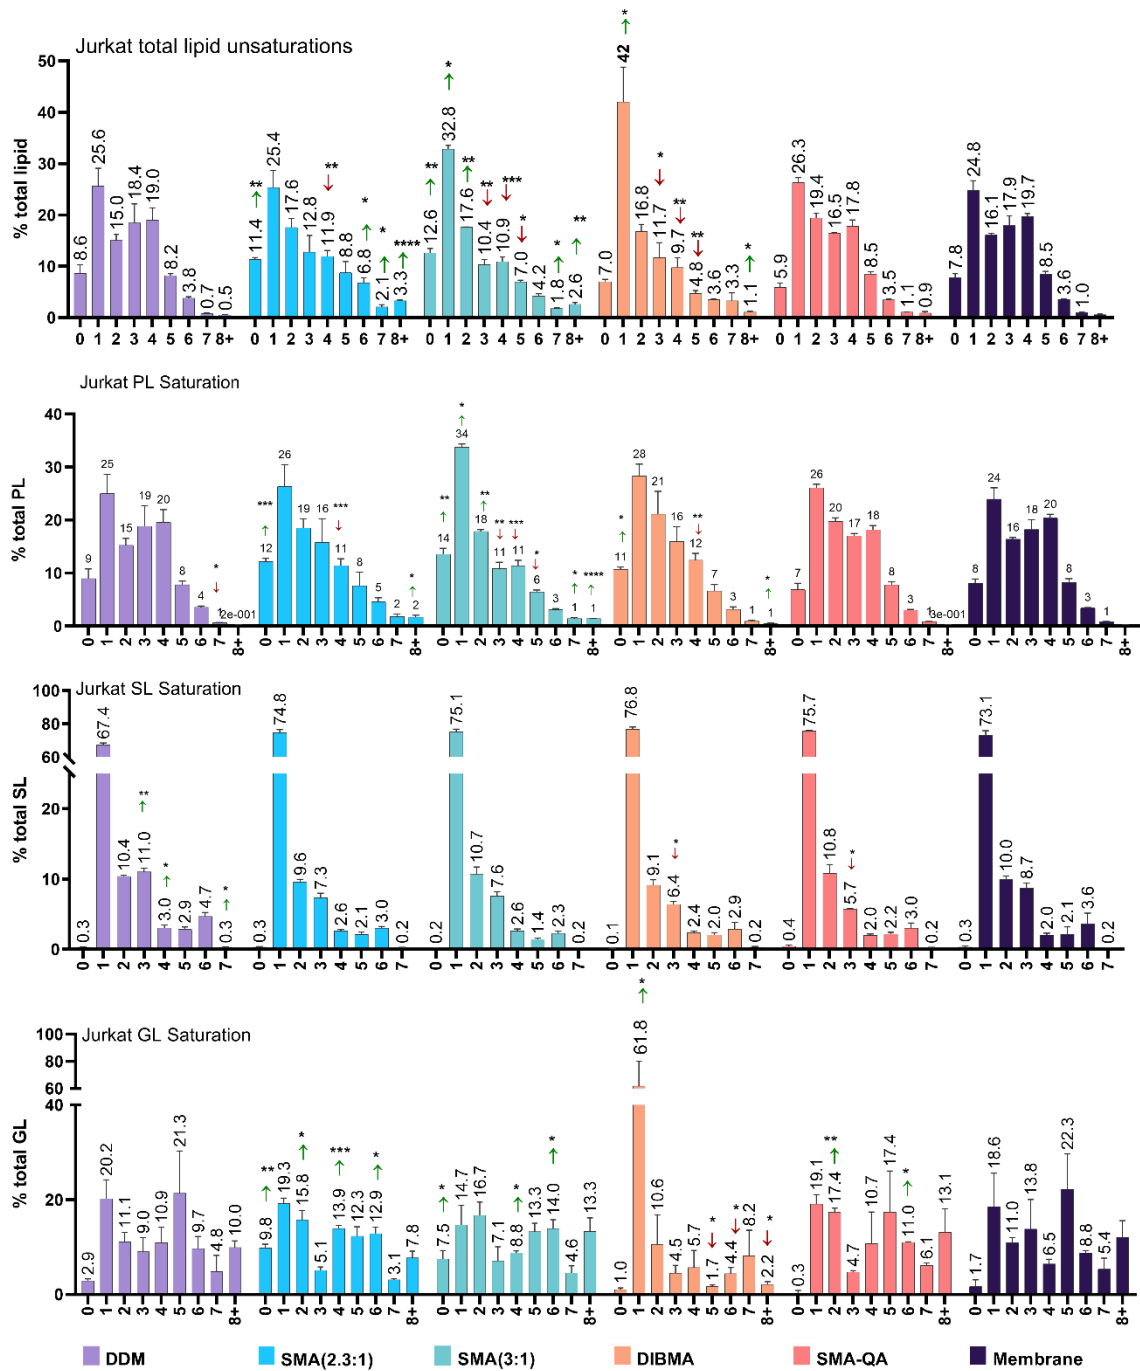

Figure S6. Saturation degree of Jurkat membranes. Represented from top to bottom, saturation profile of: all lipid species; PL; SL and GL <sup>†</sup>.

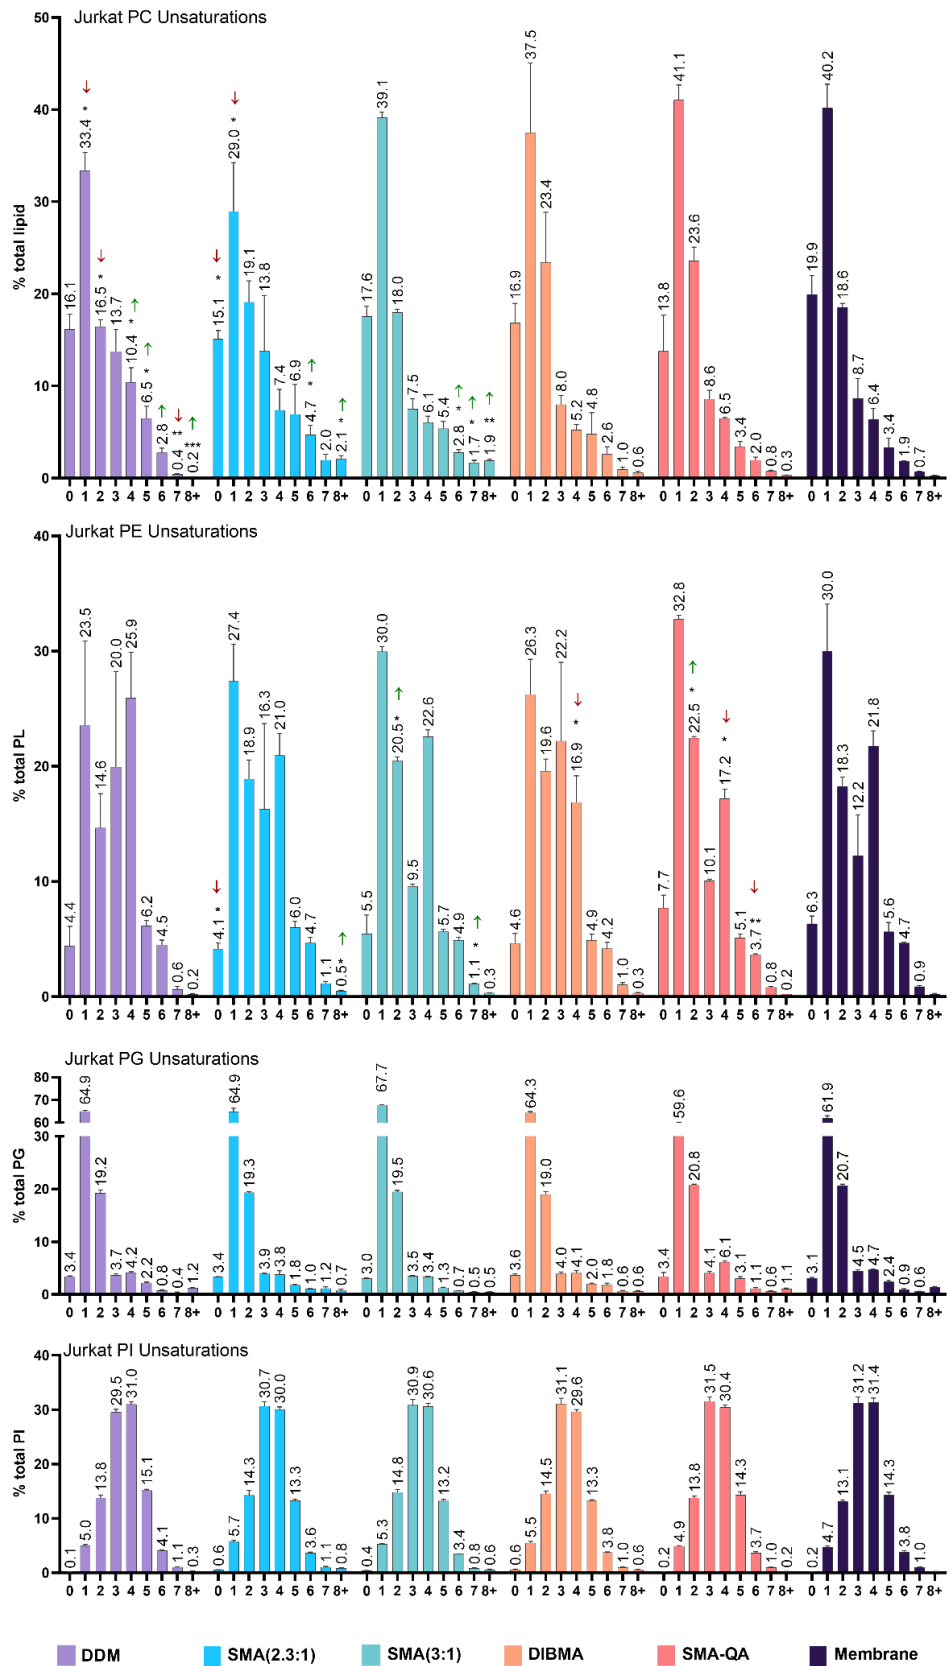

**Figure S7.** Saturation of PL species present in Jurkat membranes classified depending on their headgroup, being: PC, PG, PE or PI. The number of double bonds indicated are those found in the total fatty acid chains of a single PL species<sup>‡</sup>.

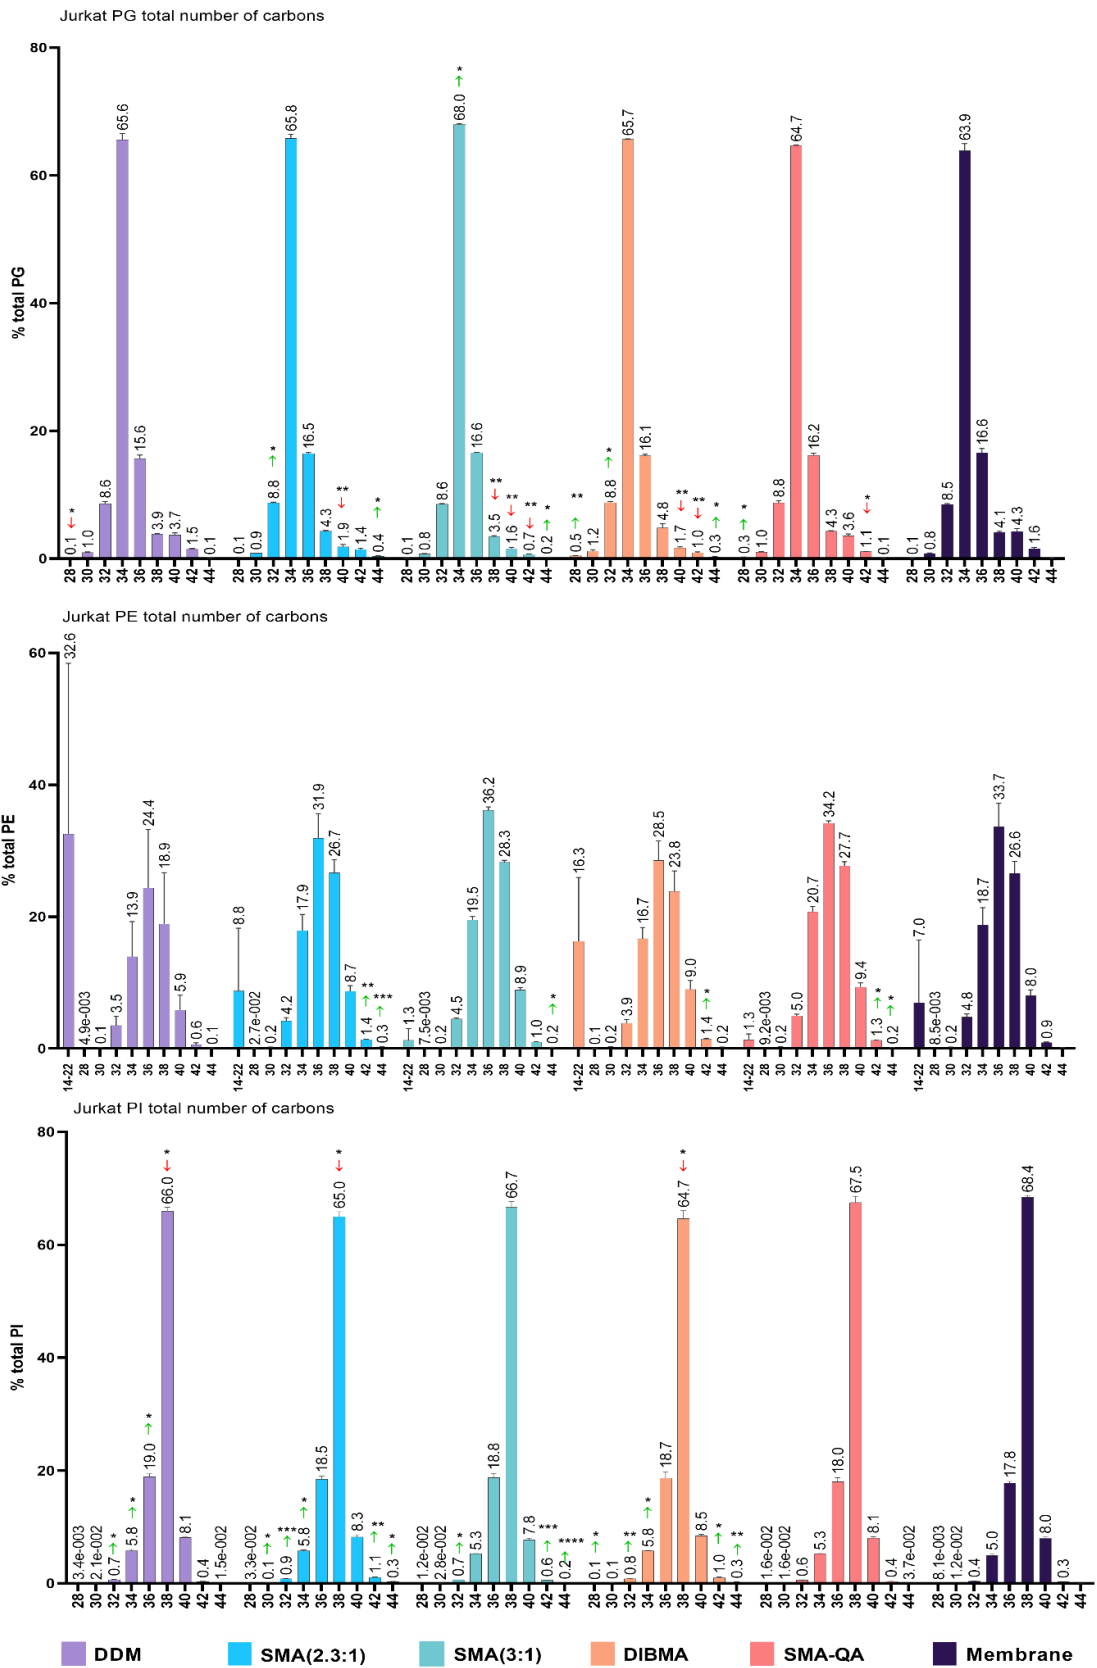

**Figure S8.** PL fatty acid chain length distribution in Jurkat samples represented by the number of carbons present in the fatty acid chains of the total PG, PE or PI species<sup>†</sup>.

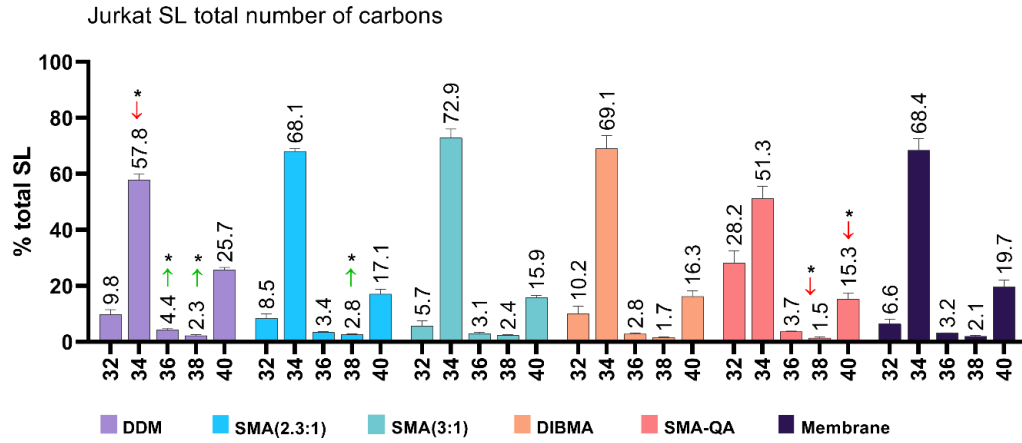

**Figure S9.** Fatty acid chain length distribution of the SL fraction present in Jurkat samples represented by the number of carbons present in the fatty acid chains<sup>‡</sup>.

## Notes

‡ Data points correspond to three technical replicates. Error bars represent  $\pm$  S.D. Significant differences (upon one-way ANOVA) are denoted as \*( $p < 0.05$ ), \*\*( $p < 0.01$ ), \*\*\*( $p < 0.001$ ), \*\*\*\*( $p < 0.001$ ).
