# Supplementary material for: Lipidomic and in-gel analysis of maleic acid co-polymer nanodiscs reveals differences in composition of solubilized membranes
Source: PubMed Central journal article supplement (PMC7886889; doi:10.1038/s42003-021-01711-3), 2021-02-16
Supplement: 42003_2021_1711_MOESM3_ESM.pdf [file 42003_2021_1711_MOESM3_ESM.pdf]

## **Description of Additional Supplementary Files**

**File name:** Supplementary Data 1

**Description:** E. Coli lipidomics analysis data.

**File name:** Supplementary Data 2

**Description:** Jurkat Cells lipidomics analysis data.

**File name:** Supplementary Data 3

**Description:** Jurkat Cells cholesterol quantification data.
